# Supplementary material
Source: MDPI journal article supplement (https://www.mdpi.com/1424-8247/17/5/654)
Supplement: s1 [file s1]

## Supporting information

### 1. Results and discussion

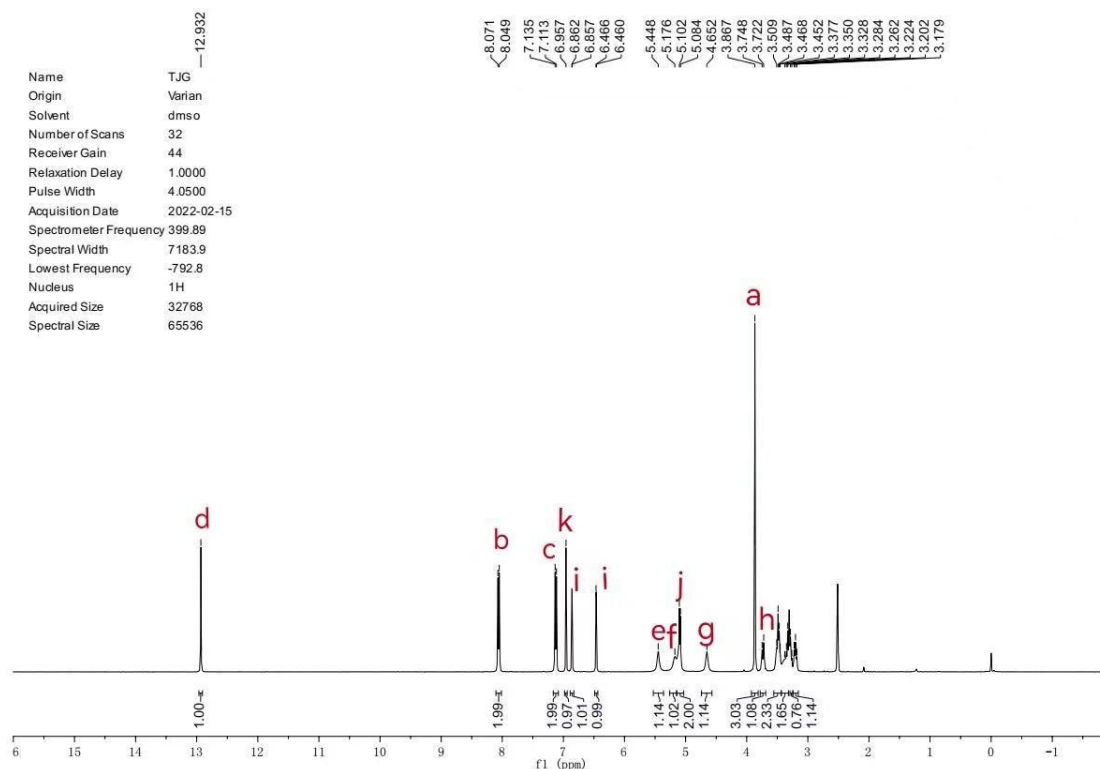

**Figure S1.** The  $^1\text{H}$ NMR detection profile of tilianin.

In  $^1\text{H}$ NMR spectra (Figure S1), a denotes H on the methyl group, b, c, k and i represent hydrogen atoms from the benzene ring, d denotes H from phenolic hydroxyl group. The e, f, g, h and j represent H from the sugar group. The specific peak position and integration proves the chemical structure of Til.
